# Supplementary material for: Cell-Wall Hydrolases as Antimicrobials against Staphylococcus Species: Focus on Sle1
Source: MDPI journal article supplement (doi:10.3390/microorganisms7110559), 2019-11-12
Supplement: s1 [file s1]

**Table S1:** Primers used in this study

| Primer name                | Primer sequence (restriction site underlined)           |
|----------------------------|---------------------------------------------------------|
| pBAD-F                     | 5'-ATGCCATAGCATT <sup>TTTT</sup> TATCC-3'               |
| pBAD-R                     | 5'-CCTGATACAGATTAAATCAG-3'                              |
| SERP0043F1                 | 5'-AACTGCAGCTGGGTATGGCTATCAACAATAC-3'                   |
| SERP0043R1                 | 5'-GAATTCGTCTTGGTTCAC <sup>TT</sup> TCATGAGGTACCCC-3'   |
| SERP0100F1 ( <i>sle1</i> ) | 5'-AACTGCAGCTGCAACAACGCATACAGTAA-3'                     |
| SERP0100R1 ( <i>sle1</i> ) | 5'-CAAGTGAGAAATTACAAATTTATTCATTGAGGTACCCC-3'            |
| SERP0318F1                 | 5'-GGGGTACCGATGCTGAAGCTTCTACACAA-3'                     |
| SERP0318R1                 | 5'-GTATCTTCATATGCATTTATCCACTGAGAATTCCG-3'               |
| SERP0422F1                 | 5'-GGGGTACCGCTAACGCACAAGAATCTGA-3'                      |
| SERP0422R1                 | 5'-CCCTAATTCATATAATTACATTCAC <sup>T</sup> GAGAATTCCG-3' |
| SERP0636F1 ( <i>atlE</i> ) | 5'-AACTGCAGCTGTATCTAGTCAAAAAAC-3'                       |
| SERP0636R1 ( <i>atlE</i> ) | 5'-GAAATTCCAACATACAAATGAGGTACCCC-3'                     |
| SERP1194F1 ( <i>lytH</i> ) | 5'-AACTGCAGCTGAAGATACAGGTCAAATTACT-3'                   |
| SERP1194R1 ( <i>lytH</i> ) | 5'-GGTTTAAACAATATTTCTCGTCCTGAGGTACCCC-3'                |
| SERP1330F1                 | 5'-GGGGTACCATCTTCTTTTCAATGATTTCA <sup>GATC</sup> -3'    |
| SERP1330R1                 | 5'-TAAAGATGACGATAAACACCAAAAAATGAGAATTCCG-3'             |
| SERP1650F1                 | 5'-AACTGCAGCTGTTGATCGTAGCTTCCATGC-3'                    |
| SERP1650R1                 | 5'-GAATTATATGGTAAAATTAATGGAAGTGAAGGTACCCC-3'            |
| SERP1702F1                 | 5'-GGGGTACCGCAAGTGAGACTACAAATGTTG-3'                    |
| SERP1702R1                 | 5'-CAGGTCATTGGGTAACTGCATGAGAATTCCG-3'                   |
| SERP1884F1                 | 5'-GGGGTACCGCTGAAAATAACAATCAACAACAAA-3'                 |
| SERP1884R1                 | 5'-TCATATAATTACATCCACCTGAATTGAGAATTCCG-3'               |
| SERP2263F1                 | 5'-GGGGTACCGAAGATTCATCTAATAAAAAATACAAATT-3'             |
| SERP2263R1                 | 5'-CAAGATTTAGATTACATTAAAGGTAAATGAGAATTCCG-3'            |
