# Supplementary material for: Cell-Wall Hydrolases as Antimicrobials against Staphylococcus Species: Focus on Sle1
Source: MDPI journal article supplement (doi:10.3390/microorganisms7110559), 2019-11-12
Supplement: s1 [file s1]

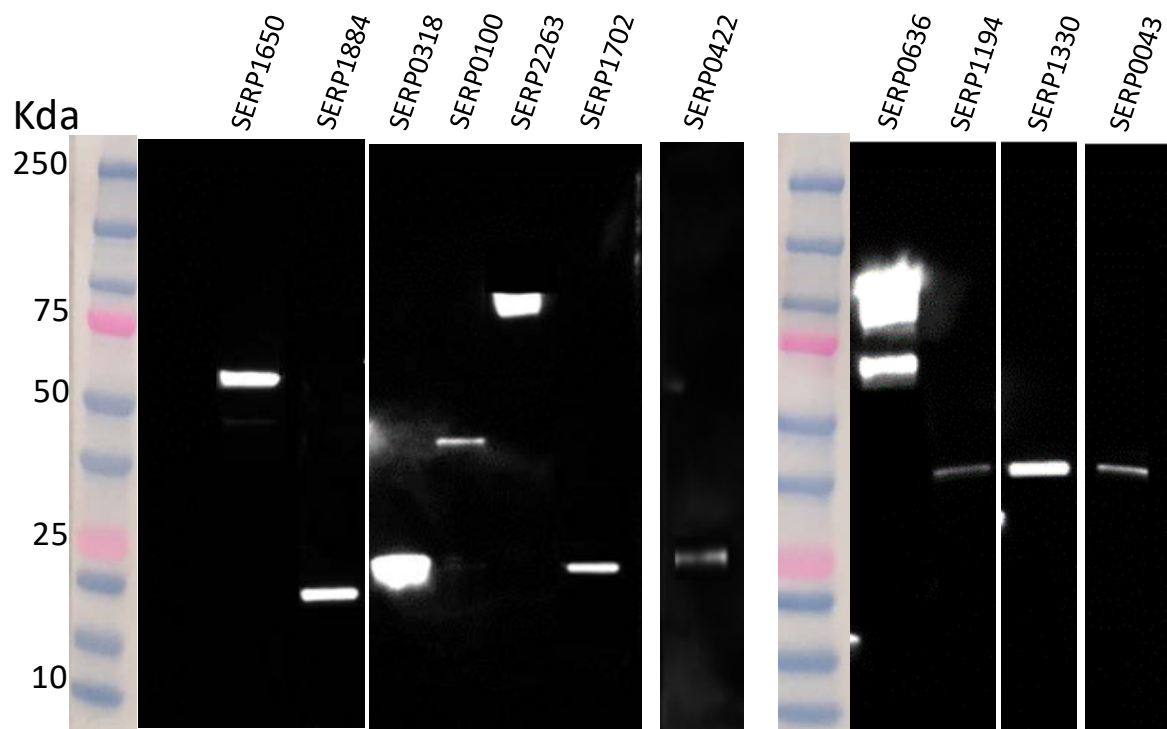

**Figure S1:** Western blot analysis of cell-wall hydrolases crude protein extracts from *E. coli* Top10 pBAD/His containing the respective inserts.
