# Supplementary material for: Cell-Wall Hydrolases as Antimicrobials against Staphylococcus Species: Focus on Sle1
Source: Microorganisms. 2019 Nov 12;7(11):559. doi: 10.3390/microorganisms7110559 (PMC6921076; doi:10.3390/microorganisms7110559)
Supplement: Supplementary file 1 [file microorganisms-07-00559-s001.zip › TableS2.xlsx]

## Sheet: TableS1
UPI (UniParc Identifier)	Protein sequence	Size (a.a.)	Cluster	SP	LysM-1	LysM-2	LysM-3	CHAP	Original annotation	Corrected annotation	Bacterial species
UPI00000E5468	MQKKYITAIIGTTALSALASTHAQAATTHTVKSGESVWSISHKYGISIAKLKSLNGLTSNLIFPNQVLKVSGSSSRATSTNSGTVYTVKAGDSLSSIAAKYGTTYQKIMQLNGLNNYLIFPGQKLKVSGKATSSSRAKASGSSGRTATYTVKYGDSLSAIASKYGTTYQKIMQLNGLTNFFIYPGQKLKVPGGSSSSSSSNNTRSNGGYYSPTFNHQNLYTWGQCTWHVFNRRAEIGKGISTYWWNANNWDNASAADGYTIDYRPTVGSIAQTDAGYYGHVAFVERVNSDGSILVSEMNWSAAPGNMTYRTIPAYQVRNYKFIH	324	1	1-25	27-70	84-127	147-190	200-324	N-acetylmuramoyl-L-alanine amidase, N-acetylmuramoyl-L-alanine amidase Sle1, LysM domain-containing protein, Autolysin (N-acetylmuramoyl-L-alanine amidase), Autolysin, Autolysin/adhesin Aae, Secreted antigen GbpB/SagA/PcsB, putative peptidoglycan hydrolase	Cell-wall peptidase Sle1 (3xLysM-CHAP domains), cluster 1	Staphylococcus epidermidis, Staphylococcus aureus, Staphylococcus haemolyticus, Staphylococcus sp., Streptococcus pneumoniae, Mycobacteroides abscessus subsp. massiliense, Enterobacter cloacae
UPI0003BEB2AA	MQKKYITALIGTTAISALATTQAHAATTHTVKSGESVWSISHKYGISIAKLKSLNGLTSNLIFPNQVLKVSGSSSSASKSKTSSNSGSVYTVKAGDSLSSIAAKYGTTYKNIMKLNGLNNFLIVPGQKLKVSGSVSTSKSTSGSKKTASSSSGRTSTYTVQYGDSLSLIASKYGTSYQKIMQLNGLSNFFIYPGQKLKVPGGGSGGSSSSSTSKSTPSGGYYTPVFYHQNLYTWGQCTWHVFNRRSEIGKGISTYWWNANNWDNAAAADGYTIDYNPTVGSIAQTDAGYYGHVAFVERVNSDGSILVSEMNWSAAPGYMTYRTIPSYQVRNYKFIH	336	1	1-25	29-71	90-132	158-200	227-311	N-acetylmuramoyl-L-alanine amidase Sle1, N-acetylmuramoyl-L-alanine amidase, LysM peptidoglycan-binding domain-containing protein	Cell-wall peptidase Sle1 (3xLysM-CHAP domains), cluster 1	Staphylococcus capitis, Staphylococcus aureus, Staphylococcus epidermidis, Staphylococcus haemolyticus, Staphylococcus sp.
UPI000792FAEA	MILEVFLVKKKYMAAIIGTSALSTVFAHQAEAATTHTVKAGESVWSISHKYGMSIARLKSLNGLKSNLIFPNQVLKVSGSSKSTANRTANTSSSTYTVQPGDSLSLIASKYNTTYQKIMQLNGLNNFFIYPGQKLKVTGTAAKNNTKPSQSSKSSIYTVQPGDSLSLIASKYNTTYQKIMQLNGLNNFFIYPGQKLKVTGTASGSSTRTSNSNSYRTPIFSHSNLYTWGQCTWHVFNRRAAIGKGISTYWWNANNWDNAAAADGYTINYTPTVGSIAQTDIGYYGHVAFVERVNSDGSILVSEMNYSASPGIMTYRTIPSYQVSSYRYIH	330	1	1-32	34-77	94-137	155-198	206-330	N-acetylmuramoyl-L-alanine amidase Sle1	Cell-wall peptidase Sle1 (3xLysM-CHAP domains), cluster 1	Staphylococcus lugdunensis
UPI00066D5D1F	MNKKVLATAIIGTGAFSTIFAHQAEAATTHTVKSGESLWSISNRYGITIAKLKSLNGLTSNLIFPNQVLTVSGSSSSHSYSNNSSSTYTVKSGDSLSSIASRYGTTYRHIMELNGLHSFLIFPGQTLKVSGTARSSSHTQSSSNSSSSSSYYTVRYGDSLSGIAWKYNTTYQNIMRLNGLNNFFIYPGQTLRVSGTASSSSNTNSTSSSSNYYYHTPIFNHRNLYDWGQCTWHVFNRRAQIGKGISTYWWNANNWDNAAARDGYRIDYHPTVGSIAQSDAGYYGHVAFVERVNSNGSILVSEMNFSAGPGILTYRTIPAYQVRQYKFIH	329	1	1-26	28-71	86-129	150-193	205-329	Secreted antigen GbpB/SagA/PcsB, Putative peptidoglycan hydrolase, N-acetylmuramoyl-L-alanine amidase, N-acetylmuramoyl-L-alanine amidase Sle1, N-acetylmuramoyl-L-alanine amidase Sle1 precursor, Surface antigen, LysM peptidoglycan-binding domain-containing protein	Cell-wall peptidase Sle1 (3xLysM-CHAP domains), cluster 1	Staphylococcus epidermidis, Staphylococcus haemolyticus, Staphylococcus hominis, Staphylococcus sp., Streptococcus pneumoniae, Mycobacteroides abscessus subsp. abscessus,
UPI000054BF44	MNKKILATAVLGTGALSTLFAHQAEASTTHTVRSGESLWSISHHYGITVSKLKSLNGLSSNLIFPNQVLKVSGSSNYSSRSNYGNSSSTYTVRAGDSLSSIASRYGTTYRHIMNLNGLNSFLIFPGQQLKVSGSVSSNSHSSYNSNSGGSSSTYTVRYGDSLSSIASRYGTTYQHIMRLNGLNNFFIYPGQKLRVSGSASSNTYSTRSAQSTYYSSPVFNHRNLYDWGQCTWHVFNRRAAIGKGISTYWWNANNWDNAAARDGYRIDGNPTVGSIAQSDAGYYGHVAFVERVNSNGSILVSEMNFSASPGILTYRTIPAYQVRNYKFIH	329	1	1-26	28-71	88-131	152-195	205-329	N-acetylmuramoyl-L-alanine amidase, N-acetylmuramoyl-L-alanine amidase Sle1, LysM peptidoglycan-binding domain-containing protein, Autolysin (N-acetylmuramoyl-L-alanine amidase), Secretory antigen SsaA	Cell-wall peptidase Sle1 (3xLysM-CHAP domains), cluster 1	Staphylococcus haemolyticus, Staphylococcus aureus, Staphylococcus sp.
UPI0002AD9D20	MNKKIIAAIVGTSAVSAIAATQADAATTHTVKSGESLWSISSKYGISISKLKSLNNLSSNIIFPNQVLKVSGSTSTSKPTSSSSTGTSSSTYTVKAGDSVSSIAAKYGMSYQKLMKLNGLNSFLIHPGQKLKVSGTVSTSKPSSSASTTGSSSTYTVQAGDSLSSIAAKYGTTYQKIMSLNGLSNFFIYPGQKLKVSGTASTSNSSSNTANSSNNAYNTPVFNHQNLYTWGQCTYHVFNRRAQIGKGISTYWWNANNWDNAAAADGYTIDGKPTVGSIAQSDSGYYGHVAFVERVNSDGSILVSEMNWAASPGIVTYRTIPSYQVNTYRYIH	332	1	1-25	27-70	90-133	153-196	208-332	Cell wall degradation protein, Spore coat assembly SafA domain protein, N-acetylmuramoyl-L-alanine amidase, LysM domain-containing protein, LysM peptidoglycan-binding domain-containing protein,	Cell-wall peptidase Sle1 (3xLysM-CHAP domains), cluster 1	Staphylococcus warneri, Streptococcus pneumoniae
UPI0002464305	MNKKIIAAIIGTSAVSAIAATQADAATTHTVKSGESLWSISSKYGISISKLKSLNNLSSNIIFPNQVLKVSGSTSTSKPSSSSSTGASSSTYTVIAGDSVSSIAAKYGMSYQKLMKLNGLNSFLIHPGQKLKVSGTVSTSKPSSSASTTGSSSTYTVQAGDSLSSIAAKYGTTYQKIMSLNGLSNFFIYPGQKLKVSGTASTSNSSSNTANSSNNGYNTPVFNHQNLYTWGQCTYHVFNRRAQIGKGISTYWWNANNWDNAAAADGYTIDGKPTVGSIAQSDSGYYGHVAFVERVNSDGSILVSEMNWAASPGIVTYRTIPSYQVNTYRYIH	332	1	1-25	27-70	90-133	153-196	208-332	N-acetylmuramoyl-L-alanine amidase, LysM peptidoglycan-binding domain-containing protein	Cell-wall peptidase Sle1 (3xLysM-CHAP domains), cluster 1	Staphylococcus warneri, Staphylococcus pasteuri, Staphylococcus sp., Streptomyces sp., Sulfitobacter donghicola, Sulfitobacter donghicola, Prevotella dentalis (Mitsuokella dentalis),
UPI0000052267	MQKKVIAAIIGTSAISAVAATQANAATTHTVKPGESVWAISNKYGISIAKLKSLNNLTSNLIFPNQVLKVSGSSNSTSNSSRPSTNSGGGSYYTVQAGDSLSLIASKYGTTYQNIMRLNGLNNFFIYPGQKLKVSGTASSSNAASNSSRPSTNSGGGSYYTVQAGDSLSLIASKYGTTYQKIMSLNGLNNFFIYPGQKLKVTGNASTNSGSATTTNRGYNTPVFSHQNLYTWGQCTYHVFNRRAEIGKGISTYWWNANNWDNAAAADGYTIDNRPTVGSIAQTDVGYYGHVMFVERVNNDGSILVSEMNYSAAPGILTYRTVPAYQVNNYRYIH	334	1	1-25	27-70	91-134	158-201	210-334	N-acetylmuramoyl-L-alanine amidase Sle1, N-acetylmuramoyl-L-alanine amidase AAA, N-acetylmuramoyl-L-alanine amidase, Putative CHAP domain protein	Cell-wall peptidase Sle1 (3xLysM-CHAP domains), cluster 1	Staphylococcus aureus, Staphylococcus aureus subsp. aureus, Staphylococcus haemolyticus, Staphylococcus sp., Streptococcus pneumoniae, Streptococcus dysgalactiae subsp. equisimilis, Clostridium scatologenes, Escherichia coli
UPI000B94E1CA	MQKKIIAAVVGTGAVSAIATAGAADAATTHRVQSGDSLWSIAQRYNTSIANIKSLNNLSSNLIFPNQVIKVSGTSTSTNRSTSGSSSASGGSTYTVRAGDSLSLIASKYGTSYQNIMKLNGLNSFLIHPGQVLKVSGTASAPAASNNTTRTQTNTATGSTYTVQPGDSLSLIASKYNTTYQNIMNLNGLNSFLIFPGQKLKVTGSTAAVTKSPSPAASTGAGGYYSPVFNHSNLYDWGQCTWHAFNRRAQTGKGISTYWWNANNWDNGARADGYTVDHNPTVGSILQSDAGYYGHVAFVERVNGDGSITVSEMNYSAGPGFATYRTIPASQRGYFNYIH	339	2	1-26	28-71	92-135	159-202	215-339	Putative autolysin with LysM domain, LysM peptidoglycan-binding domain-containing protein	Cell-wall peptidase Sle1 (3xLysM-CHAP domains), cluster 2	Staphylococcus piscifermentans, Staphylococcus hyicus, Staphylococcus sp.
UPI0002994BD9	MQKKIIAAVVGTSAVSAIATAGAADAATTYRVQAGDSLWSIAQRHNTSIANIKSLNNLSSNLIFPNQVLKVAGSANTSSQRTSGGSSVSGGSTYTVQPGDSLSLIASKYGTTYQNIMRLNGLNGFLIHPGQVLKVSGTASNSTTTSNTTRVSGGSVYTVQPGDSLSLIASKYGTTYQNIMSLNGLNNFFIYPGQKLKVTGTTAANTNSPSPGVSTSTGGYYSPVFNHSNLYDWGQCTWHTFNRRAQIGKPISTYWWHAYNWDNAARADGYTVDRNPTVGSILQSDAGYFGHVAFVERINGDGSVLVSEMNFTGNPGYTTYRTIPASQVGYYNFIH	335	2	1-26	28-71	92-135	155-198	211-335	N-acetylmuramoyl-L-alanine amidase, LysM peptidoglycan-binding domain-containing protein, Putative autolysin with LysM domain, Uncharacterized protein, Hypothetical protein	Cell-wall peptidase Sle1 (3xLysM-CHAP domains), cluster 2	Staphylococcus simulans, Staphylococcus hyicus, Staphylococcus sp.,
UPI0005C8D566	MRKKVIAAVIGTSAISAVAATSDADAATYRVQAGDSLWSIATKHNISIAQLKSLNNLNSNLIFPNQVLQVSGGSTPVRNTNTTTSGSTYTVRSGDSLAAIAARYGTTYQNIMRLNGLNSFLIFPGQQLKVSGTAVSNQATQQTTNNASTGTGSYYTVQPGDSLALIASKYGTTYQNIMNLNGLSGFLIHPGQKLKVSGTAVSTQTQTQSWNTPSTSYSSPVFNHSNLYDWGQCTWHVFNKRQAAGRPISTYWWNANVWDDNALRDGYTVNNRPAVGAILQSDLGYYGHVAYVERINADGSLLVSEMNFNGGVGIQTYRTIPSYSVYSYKYIH	332	3	1-26	27-70	87-130	153-196	208-332	N-acetylmuramoyl-L-alanine amidase, LysM peptidoglycan-binding domain-containing protein, N-acetylmuramoyl-L-alanine amidase Sle1	Cell-wall peptidase Sle1 (3xLysM-CHAP domains), cluster 3	Staphylococcus microti
UPI0001F6BCC1	MRKKFIAAVIGTTAAATALSAHADASTTYRVQPGDSLWAIATKYNITIAQLKQYNGLNSNLIFPNQVLKVSGGSSTSRTTTHHSSHSTTSSTVYTVRYGDTLSGIAARYGTTYQNIMKWNGLNNFLILPGQKLNVSGPSTTPSRSTAKKPAPKTSSRNASYYTVQPGDSLSLIASKYGTTYQHIMELNGLTSFLIFPGQQLKVSGSAPSRQTTPTPSPSYQSPTFNHQNLYDWGQCTWYVFNKRKEMGRPISTYWWNANAWDDNAARDGYTINNQPAVGSILQSDLGYYGHVSYVERINADGSILVSEMNFTAAPGILTYRTVPAHRVSAFKYIH	335	3	1-25	27-70	92-135	160-203	211-335	LysM peptidoglycan-binding domain-containing protein, N-acetylmuramoyl-L-alanine amidase Sle1, N-acetylmuramoyl-L-alanine amidase, Autolysin, Autolysin precursor	Cell-wall peptidase Sle1 (3xLysM-CHAP domains), cluster 3	Staphylococcus pseudintermedius, Staphylococcus aureus, Staphylococcus sp.
UPI00057DAFDE	MRKKIIAAVIGTSAVSAIAAHDADAATYRVEAGDSLWSIANQFNISIAQLKSYNGLTSNLIFPDQILKVSGGRTSSNPSRVTNTGGSSSGSTYTVRSGDTLSSIAARYGTSYTNIMRLNGLSSTLIYPGQTLKVSGRASAPTPTRTPRTPSRPASTSTGSAQTYTVQAGDSLSAIAARYGTTYQNIMALNGLTSFLIFPGQTLKVSGSAATPTQPSAPVVPTGSGYYSPVFNHSNLYDWGQCTWHVFNKRLAAGKGISTYWWNANAWDDNAARDGYTINNRPAVGSILQSDMGYYGHVAYVERVNADGSILVSEMNYSASPGILTYRTIPAYSVGQFKYIH	341	3	1-25	26-69	91-134	162-205	217-341	LysM peptidoglycan-binding domain-containing protein, N-acetylmuramoyl-L-alanine amidase Sle1	Cell-wall peptidase Sle1 (3xLysM-CHAP domains), cluster 3	Staphylococcus hyicus, Staphylococcus sciuri subsp. rodentium, Staphylococcus sp.
UPI0004A8923E	MRKKLIAAVIGTSAVTAVAAHDAEAATYRVQAGDSLWSIANKFNISIAQLKSYNGLNSNLIFPDQVLKVSGGRTSTTTQNNRTTGTASGSTYTVRSGDTLSSIAARYGTSYTNIMRLNGLSSTMIYPGQTLKVSGRATTTSPSRPAPTRPISGAQSTYTVQAGDSLSSIAARYGTTYQNIMNLNGLTSFLIFPGQTLKVSGSTTPTSTSTPTPTNSGYYSPVFNHSNLYDWGQCTWHVFNKRQAAGKGISTYWWNANAWDDNAARDGYTINNRPAVGSILQTDVGYYGHVAYVERVNADGSILVSEMNYSASPGIMTYRTIPAYSVAQFKYIH	333	3	1-25	26-69	90-133	156-199	209-333	LysM peptidoglycan-binding domain-containing protein, N-acetylmuramoyl-L-alanine amidase Sle1	Cell-wall peptidase Sle1 (3xLysM-CHAP domains), cluster 3	Staphylococcus chromogenes (Staphylococcus hyicus subsp. chromogenes)
UPI0001916BE6	MKKKLIFAATTATAAASAYSYQADAAEHRVKAGESLWSIANQYNTSVAQLKTLNNLSSNLIFPNQSLQVSKSVSNTRSATAQTTNRPAVQGGGNTYTVVSGDSLSLIAYRHNTSVNELMRLNNLTGYLIFPGQRLKVSGTTTTVSTTRPTAVTSNATSHVVQSGEYLSLIASRYGITVAQLKSLNGLTSDLIFPNQRLVVKGNAVQGTPTVSPVASRAPVSTTVTNYVTPVFAHSNLYDYGQCTWYVFNKRASMGKGISTYWWHARNWANGAIKDGYTVNRTPAYGAIAQTSDGYYGHVAFVERVNGDGTILVSEMNYATGVGVIGYRTLNQWQVSRYVFIH	342	4	1-25	26-69	94-137	157-200	218-342	N-acetylmuramoyl-L-alanine amidase, Uncharacterized protein, LysM peptidoglycan-binding domain-containing protein, Hypothetical protein, Conserved hypothetical protein	Cell-wall peptidase Sle1 (3xLysM-CHAP domains), cluster 4	Macrococcus caseolyticus
UPI000BB53E53	MKKKLIFAATTASAAVATYSHQAEAAEHKVQPGESLWSIANQYNTSIDQLKSLNQLSSNLIFPYQTLKVSGEVTRTNATTSTTNVSRPQSDTSTGNTHVVQSGESLSIIAAKYNTSVAQIMRLNNLSGYLIFPNQKLKVTGAVSTTIPMTTTSTNSGTTGAKVHIVQHGDYLAKIASQYGVSIQSIKQWNNLSSNIIYSNQRLIVSGNAVAATIPTSDVQKAPAKVVTIPVVTKTPVFAHANLYDYGQCTWYVFNKRAAIGKGISTYWWHAYNWASGARKDGYTVNSTPAVGSMATTTDGPYGHVAFVERVNADGTIMVSETNYLTPSGVVGYRTLTLSQMSRYQFIH	348	4	1-25	26-69	96-139	162-205	224-348	N-acetylmuramoyl-L-alanine amidase, LysM peptidoglycan-binding domain-containing protein	Cell-wall peptidase Sle1 (3xLysM-CHAP domains), cluster 4	Macrococcus sp.
UPI000762E74B	MKHKKLVVGTSLAATAAIAAVTAPQVNAESYTVKFGDTLSELALQFNTTIEEIRDANNIQDINKIFAGETFEIPTATKEAAPQHPVQTQEVKETAAVEHHEEVQKDTHSALQNGVYTVLAGDTLNRIAEEFGTTAQAIRDLNGIQGDLIFVGQPLQVKVGLVSTAKVSDDQDDEVIVEEYAKDAPSTEQAATSEYTVVPGDTLAKIAEAYGLNVEELQLANGLDSDFIYAGQVLAVSPQAVSQAQKSQEKAEQERQAQAAQEKAEQERQAQAAQEKAEQERQAQAAQEKAAQEAQLREEARQKEAARQAREAQKKEAVAQPTAKIAQHGPYNGSVDPRNLAPAGQCTAYVINRLYGLGRPVPGMMGNANEWGAYAAQYGLAVSNHPQVGTAVSFPAGVA…	450	5	1-28	31-74	116-157	195-236	343-25	Uncharacterized protein, LysM peptidoglycan-binding domain-containing protein, Hypothetical protein	Cell-wall peptidase Sle1 (3xLysM-CHAP domains), cluster 5	Aerococcus christensenii
UPI0008899398	YTVRPGDWLAKIADQFGITVNQLKTWNNLRSNYIYAGDILLVSQPNDISDPKPNTPDKTGQDKVKTYVVQSGDSLYSVAKNFGVSVSNLKKWNEMTSNTLYEGYALIVNDAQPSSPVIRVEDQGDQYKDNQSLKHTPYEYSYHIVQAGDSLETISWQHEIKVSELKKLNNLTTTHLTVGQKILISKVPTQEKVNIEPTEVTNANVERLLDIARSYLGVTKYSPEHRALVDAYNRIYPKPVGYSLTYDDDWCDAFVTHIADEAGLSRLTGREVGVERHKNIVKNKGIWMGLTKPKAGDIIFFNWDGYRNGWGHHIGIVESYNNGLITTFEGNTTINDSKRMVARKEFAWDSIYIQGYGRPRY	361	5	-	1-43	67-109	143-185	241-331	LysM repeat-containing protein	Cell-wall peptidase Sle1 (3xLysM-CHAP domains), cluster 5	Facklamia miroungae
UPI0003713CE3	MNHSTKSLLVGTVGAASLFLAGTASASANTTHTVANHDTVWDLSEKYGVSVQSIEQLNHISSNSHLIFPGDDVQIPSKNAKAQPAKASTPKQTANTSTYTVKAGDSLWTIAQAHKTSVDKLLALNNLKSSDLQPGQSLKVVGTAVAQPSKPVAQPQQAEAKPEVQAQPKQQEVKQQPQQKSAQPQVAANHVDHSVVSGESLFTIANKYGVSVDSIRQANGLQNAAVSIGQSLIINNPTKDPNAAKKQASNQEAKEDNNTQQVAQANTNNDQKAHAQTQAQNSQSNSNNNNSVRTSNNGSNYQAPVQNKQAQPKAQAQPQAKKSVNSAGNTYAMGQCTWYVKNVASWAGNNWGNGQDWANSARQAGFRVDNTPSAGSIAVYAGGANVGGWTAAPGYGHVA…	440	5	1-26	30-75	97-140	191-234	311-439	Surface antigen, LysM peptidoglycan-binding domain-containing protein	Cell-wall peptidase Sle1 (3xLysM-CHAP domains), cluster 5	Lactobacillus pobuzihii
UPI0007125631	MLVGTIGAASLFLAGNAGVSADTTHKVANHDTVWGLSQKYGVSIQSIEQLNHISSNSHLIYPGQNVQIPDKDAKATPVKATTPKQTANTSTYSVKAGDSLWTIAQAHKTSVAKLMSLNNLNSSVLQPGQTLKVVGTVAAQPAKTQAQPQQQPQATQPEEKAEQQQPTQPAKTEAVQTKAQPKVSANHVTHEVKSGESLYTLANDYGVTVDSLREANALSSSALQVGQSLTINDPTKDPSAVQSAPTAAPVKTSVQQTAKAQSSTPAPQKTEQQSNSTANNNVVSKPQQTVSNSSNTVQSTPVASSNQQHGQAANSAGNTYAWGQCTWFAKNRASWAGNYWGNGGNWDSSARSQGFAVNNTPAAGSLVVFHPGQSVGGQWTADGYAGHVAYVESVSGNTI…	432	5	1-21	23-68	90-133	188-231	300-429	Surface antigen	Cell-wall peptidase Sle1 (3xLysM-CHAP domains), cluster 5	Lactobacillus acidipiscis
UPI000379BDF6	MEQKSQKLILGTVGVAGLFLAGGATVSANTTHKVAENDTVWGLSQKYGVSVKSIEELNHVDSNSHLIFTGHTIDIPDKATKSVAKPATKAAPKEKTQTATSTYEVKAGDSLWSIAQAHNTTVDRLRSLNSLGSGVIVPGQALKVDGPATKAAQPNEAAQSAAKKAQAPKQQEASTTTTKEAQKATPVTPAKGSTPSVQPQQDKNSNKDVQPQQTKQVVEQPQAPQESSAKKSAAPVKETEKPAVQTEKDNEQNVSQPKDEPVQKEDVQKDEQSKQKEAAQPKVSANHKTHSVKSGESLFTIAADYGVSVDSIRQANTLSSSALQVGQSLTVNDPTKDPSATATAKPAQASPNSTAKQNVQPAAQKQPSTPAPSQTSNNSSNNNASQNSASSTTTNTSNT…	553	5	1-28	30-75	101-144	288-331	423-552	Surface antigen, Hypothetical protein	Cell-wall peptidase Sle1 (3xLysM-CHAP domains), cluster 5	Lactobacillus pobuzihii
UPI00024663F9	MNASVKNTLLVTAGAAATLAGSAVVASADSITVKAGDTLYALAAAHNTTVADLVSANGLSNANMIFVGQQLQLPGSNNGANNNNNTAANPAATGTYTVKAGDSLWGIANNHGMNLSELLSLNGLQMNSVIHPGDTLKLSGDAAVDNNNQASNDNQADAQAPATNGTYTVKAGDSLWAIANNHGMSLTDLLNLNGLQATSMIHPGDILRVSGDASSANNDNNSSASQNDNASNNNDYTNSGSVSTTNNTYPYGQCTWYAKGQLDWVGNWWGNAADWTTSAVNAGHYVDSTPSAGSVIWFTPGVGGVSVYGHVGVVESVNADGTITISEGNYAPGMLYHQRTISPAGHLFIHK	351	5	1-28	29-73	94-138	165-209	229-350	LysM domain-containing protein, LysM peptidoglycan-binding domain-containing protein, Autolysin (N-acetylmuramoyl-L-alanine amidase)	Cell-wall peptidase Sle1 (3xLysM-CHAP domains), cluster 5	Streptococcus pneumoniae, Weissella confusa
UPI000619CAC6	MHKKIIATVIGTSALAAINSANADAATTYKVKSGDSLWSIANKYNISIAKLKSLNNLTSNVIFPNQTLKVSGTTTSSTSTSSSSATTYTVKSGDSLSSIAAKHGTTYQKIMSLNGLSNFTIYPGQKLKVSGSTSTSTSGSTASGSTTTYTVKSGDSLSAIAAKYGTTYQKIMSLNGLKNFNIYPGQKLKVSGTASSSSGSTGSTGYKTPVFNHSNLYDWGQCTWHVFNKRAQIGKGISTYWWNANNWDNAAPGDGYTVDHRATVGSILQSDLGYYGHVAFVESVNSNGSITVSEMNYSASPGIVTYRTIPASQVSSYKYIH	321	6	1-25	27-70	86-129	147-190	197-321	LysM peptidoglycan-binding domain-containing protein, Autolysin (N-acetylmuramoyl-L-alanine amidase), N-acetylmuramoyl-L-alanine amidase,	Cell-wall peptidase Sle1 (3xLysM-CHAP domains), cluster 6	Staphylococcus cohnii, Staphylococcus cohnii subsp. cohnii, Staphylococcus sp.
UPI0000589E0E	MRKKIIATVIGTSALAAVTWTNADAATTYKVKSGDSLWSIANKYNMSVAKLKSLNNLTSNVIFPNQSLKVSGSTSSSTSSNTSTGSTYTVKSGDTLSGIAAKYGTTYQKIMSLNGLSNFNIYPGQKLKVSGAASSSSSNTSGNTSSGSTTTYTVKSGDSLSAIAAKYGTTYQKIMSLNGLTNFNIYPGQKLKVSGKASTGGSGSSSTGSAGYKTPVFNHSNLYDWGQCTWHVFNKRAQIGKGISTYWWNANNWDTAAAADGYTIDRKATVGSILQSDMGYYGHVAFVESVNANGSITISEMNYSASPGIVTYRTIPASQVSSYVYIH	327	6	1-25	27-70	86-129	150-193	203-327	N-acetylmuramoyl-L-alanine amidase Sle1, Cell wall degradation protein, N-acetylmuramoyl-L-alanine amidase, LysM peptidoglycan-binding domain-containing protein, Hypothetical protein, Autolysin (N-acetylmuramoyl-L-alanine amidase)	Cell-wall peptidase Sle1 (3xLysM-CHAP domains), cluster 6	Staphylococcus saprophyticus subsp. saprophyticus, Streptococcus equi subsp. equi, Staphylococcus sp.
UPI000709BB68	MRKKIIATVIGTSAIAAVTSVNADAATTYKVKSGDSLWSIANKYDISISKLKSLNNLTSNVIFPNQTLKVSGSTNTSSGSTYTVKSGDTLSGIAAKNGTTYQKIMSLNNLSSTNIYPGQKLKMSGTASTGGSSSSGVTSSGSTMTYTVKSGDSLSAIAVRYGTTYQKIMSLNGLSNTNIYPGQKLKVSGTAATGGSGSSGSTGYNTPIFHHSNLYDWGQCTWHVFNKRAQIGKGISTYWWNANSWDTGAAADGYTVDHKATVGSILQSDQGYYGHVAFVESINSNGSITISEMNYGASPGIVTYRTIPASQVSSYKYIH	319	6	1-25	27-70	80-123	144-187	195-319	N-acetylmuramoyl-L-alanine amidase, LysM peptidoglycan-binding domain-containing protein	Cell-wall peptidase Sle1 (3xLysM-CHAP domains), cluster 6	Staphylococcus sp.
UPI0005B49D9B	MRKKILATVIGSSALAAVATTSNAEAATTYKVKSGDSLWSIANKFNISVSKLKSLNNLSSNVIFPNQTLKVSGTTSSSTSSTSTSSGTTYTVKSGDSLSAIAAKYGTTYQKIMSLNNLSNYNIYPGQTLKISGSTSTSTGSTGGTSTSGSTTYYTVKSGDSLSAIAAKYGTTYQKIMSLNNLSNYNIYPGQRLKVSGTATSGSSSSGSTSGSTSYNTPIFNHSNLYDWGQCTWHVFNRRAEIGKGISTYWWNANNWDTASAADGYTVDHKATVGSILQSDAGYYGHVAFVESKNSDGSITVSEMNYSASPGIKTYRTIPASQVSAYKYIH	330	6	1-26	28-71	88-131	152-195	206-330	N-acetylmuramoyl-L-alanine amidase, LysM peptidoglycan-binding domain-containing protein	Cell-wall peptidase Sle1 (3xLysM-CHAP domains), cluster 6	Staphylococcus gallinarum, Staphylococcus petrasii subsp. pragensis, Staphylococcus sp.
UPI000449AD35	MKKKTIAAFVGASVAVAVSSHQAEAATYKVKSGDSLWLIADKHNTTIAKIKSLNNLSSNLIFPNQVLQVPGTSNSTSTSNTSSRSTSTSSTTYYTVKSGDTLGVIAGKYGTTYQKIMSLNGLSNTIIYPGQKLKVNGTASSSSNTGSSSNSGASNASGSTSTYTVKSGDSLSAIAARYGTTYQKIMSLNGLSNFIIYPGQKLKVSGTASSSGSTSNSNNNSGYTSPTFNHQNLYDWGQCTWHVFNRRKAIGKPISTYWWNANNWASAAAKDGYVVNRTPSVGSILQSSAGYYGHVSFVERINSNGSLQVSEMNFSSSPGVLTYRTIPASQVSSYNYIH	338	7	1-25	26-69	92-135	161-204	214-338	Uncharacterized protein, LysM peptidoglycan-binding domain-containing protein, Hypothetical protein	Cell-wall peptidase Sle1 (3xLysM-CHAP domains), cluster 7	Staphylococcus aureus
UPI0002F60F7F	MKKKTLTAFVGASVAVALTSQSAEAASYKVKSGDSLWLIAEKHNTTIAKIKSLNKLSSNLIFPNQIIQVPGSSSSSNTNTGSTSTSSTTYYTVKSGDSLSVIAGKYGTTYQKIMSLNGLNNTIIYPGQKLKVKGTSSSSSSNNTGSSNTSTSTTTYTVKSGDSLSVIAARYGTTYQKIMSLNGLSNFIIYPGQKLKVSGSVSTGGGQSSSNNTGSYTPPMFYHQNLYDWGQCTWHVFNRRKAIGKPISTYWWNANNWASAAAKDGYRVNHKPAVGSILQSSAGYYGHVSFVERINNDGSIQVSEMNFTSSPGVLTYRTVPASLVPSYNFIH	331	7	1-25	26-69	89-132	154-197	207-331	N-acetylmuramoyl-L-alanine amidase, LysM peptidoglycan-binding domain-containing protein, Autolysin (N-acetylmuramoyl-L-alanine amidase)	Cell-wall peptidase Sle1 (3xLysM-CHAP domains), cluster 7	Staphylococcus lentus, Staphylococcus sp.
UPI00077CE77D	MHKKIIATILGTSALATVAATNADAATTYKVKSGDSLWSIAEKFKISVSKLKSLNKLSSNVIFPNQVLTVSGATSTKSTKTTTTATAKTYTVKSGDSLSAVASKYGTTYQKLMSLNGLKNTIIYPGQKLKVSGTATKTTTNTPAKTTSTASTSTYTVKSGDTLSVIASKYGTTYQKIQSLNGLSNFIIYPGQKLKVPGTSTTTKTGATTASSGYKTPIFNHANLYDWGQCTWHVFNRRAEVGKGISTYWWNANNWDTAAAQDGYTVDHRATVGSILQSDAGYYGHVAFVERVNSNGSIYISEMNYGAAPGIKTFRTIPATQVSSYKFIH	329	-	1-25	27-70	88-131	153-196	205-329	N-acetylmuramoyl-L-alanine amidase, LysM peptidoglycan-binding domain-containing protein, Autolysin (N-acetylmuramoyl-L-alanine amidase)	Cell-wall peptidase Sle1 (3xLysM-CHAP domains)	Staphylococcus kloosii, Staphylococcus saprophyticus
UPI0002432D9C	MRKKLIASVIGTSAVAALSGVHADAATTHTVKSGDSLWSIAHKYNMTVAKLKTMNNLSSNMIFPNQTLRVAGSQTNTSYTNNTTTANNNGSSYTVKRGDTLFGIARRYGVNYQQLMRNNNLSNTLIYPGQNLKVSGRAISSTPNQTTTNRTPAANNNSSVYTVQRGDSLYGIASRHGMNLQRLMALNGLSNYFIYPGQKLKVSGTVSTPATNNTRPNTANTQTNAYNSPVFNHANLYDWGQCTWHAFNRRAQIGKGISTYWWNANNWDDAAARDGYVVNNRPTVGSILQSDAGYYGHVAFVERVNGDGSILVSEMNYSAAPGVTTYRTIPAYQTGYFKYIH	341	-	1-25	27-70	91-134	159-202	217-341	N-acetylmuramoyl-L-alanine amidase Sle1, LysM peptidoglycan-binding domain-containing protein	Cell-wall peptidase Sle1 (3xLysM-CHAP domains)	Staphylococcus pettenkoferi
UPI0002822D74	MQKKIIATVIGSSAVAAVAATHAEGATTYKVQSGDSLWSIANKYNMSVSKLKSLNNITSNVIFPNQVLTVSGTTSSSSSTTTSSSTTYYTVKSGDSLSSIAAKYGTSYQKIMSLNGLNNYVIYPGQRLKVSGSTSTSTSGSTSSNTSTTSYYTVKSGDSLSAIAAKYGTTYKKIMELNGLSDYFIYPGQRLKVSGSSSTSGGSTSSGTSYKTPVFNHSNLYDWGQCTWHVFNRRAQIGKGISTYWWNANNWDNAAPQDGYTVDRKPTVGSILQTDAGYYGHVAFVERVNSDGSVYVSEMNYSAAPGVKTFRTVSASQVANHKFIH	325	-	1-25	29-71	91-130	154-193	219-300	LysM peptidoglycan-binding domain-containing protein, Signal peptide	Cell-wall peptidase Sle1 (3xLysM-CHAP domains)	Staphylococcus arlettae
UPI00029E1E1F	MPKKLVTAIIGTSALSGIVAQQADAESYRVQSGDSLWSIANKFNTSISELKSLNNLTSNMIFPNQVIQVSSSSSNETTANSQTTSSSSSTYTVKSGDTLGAIAYKHGTSYQKLMSLNGLSSTIIYPGQTLKVSGSAATTTTSNQTETTTSANGTYTVQYGDSVSLIAYKHGMSYQELMRINNLNSYFIYPGQVLKVSGNSSTPTPSTTTTTQAPTSGYNTPIFNHSNLYTWGQCTWHVFNRRAQVGKGISTYWWNANAWDSGAISDGYRVDGTPTVGSILQSDLGYYGHVAFVERVNSDGSLLVSEMNYSAAPGIATYRTIPSYQVGNFQYIH	333	-	1-25	26-69	89-132	153-196	209-333	LysM domain-containing protein, LysM peptidoglycan-binding domain-containing protein	Cell-wall peptidase Sle1 (3xLysM-CHAP domains)	Staphylococcus massiliensis
